# Supplementary material for: Effect of reduction temperature on the structure and catalytic performance of mesoporous Ni–Fe–Al2O3 in oxidative dehydrogenation of ethane
Source: Royal Society of Chemistry journal article supplement (doi:10.1039/d0nj02618b), 2020-01-01
Supplement: d0nj02618b1.pdf [file d0nj02618b1.pdf]

## Supporting Information

### Effect of reduction temperature on structure and catalytic performance of mesoporous Ni-Fe-Al<sub>2</sub>O<sub>3</sub> in oxidative dehydrogenation of ethane

Xia Xu<sup>a,b</sup>, Suresh Kumar Megarajan<sup>a</sup>, Xuefa Xia<sup>a,b</sup>, Arafat Toghan<sup>c,d</sup>, Armin Feldhoff<sup>e</sup>, Yan Zhang<sup>a,†</sup>, Heqing Jiang<sup>a,†</sup>

<sup>a</sup> Key Laboratory of Biofuels, Qingdao Institute of Bioenergy and Bioprocess Technology, Chinese Academy of Sciences, Qingdao 266101, China

<sup>b</sup> University of Chinese Academy of Sciences, Beijing 100049, China

<sup>c</sup> Chemistry Department, Faculty of Science, South Valley University, Qena 83523, Egypt

<sup>d</sup> Chemistry Department, College of Science, Imam Mohammad Ibn Saud Islamic University (IMSIU), Riyadh 11623, KSA

<sup>e</sup> Institute of Physical Chemistry and Electrochemistry, Leibniz University of Hannover, Callinstr. 3A, 30167 Hannover, Germany

---

<sup>†</sup> Corresponding author. Tel.: +86-532-80662716; fax: +86-532-80662716. E-mail address: [zhangyan@qibebt.ac.cn](mailto:zhangyan@qibebt.ac.cn); [jianghq@qibebt.ac.cn](mailto:jianghq@qibebt.ac.cn)

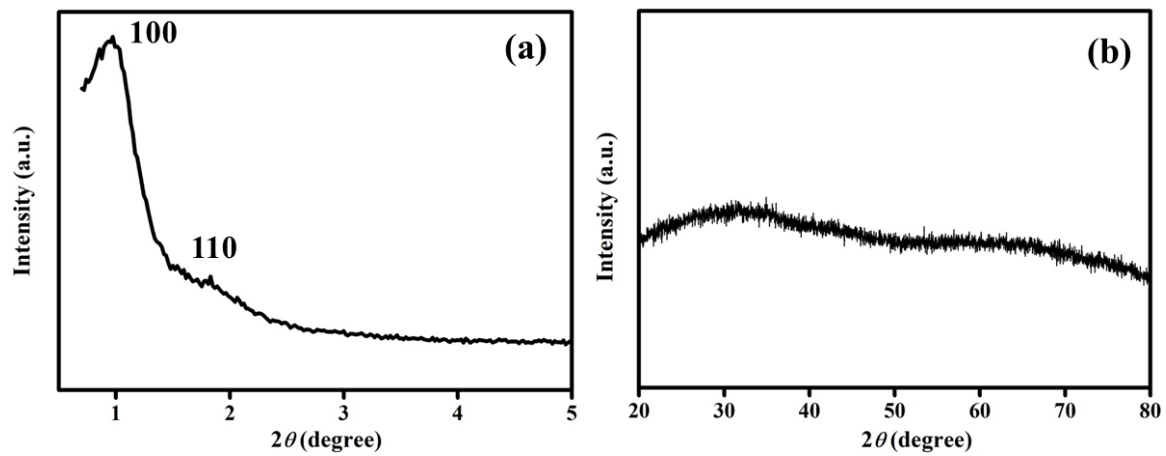

**Figure S1.** (a) Small- and (b) wide-angle XRD patterns of fresh Ni-Fe-Al<sub>2</sub>O<sub>3</sub> catalyst.

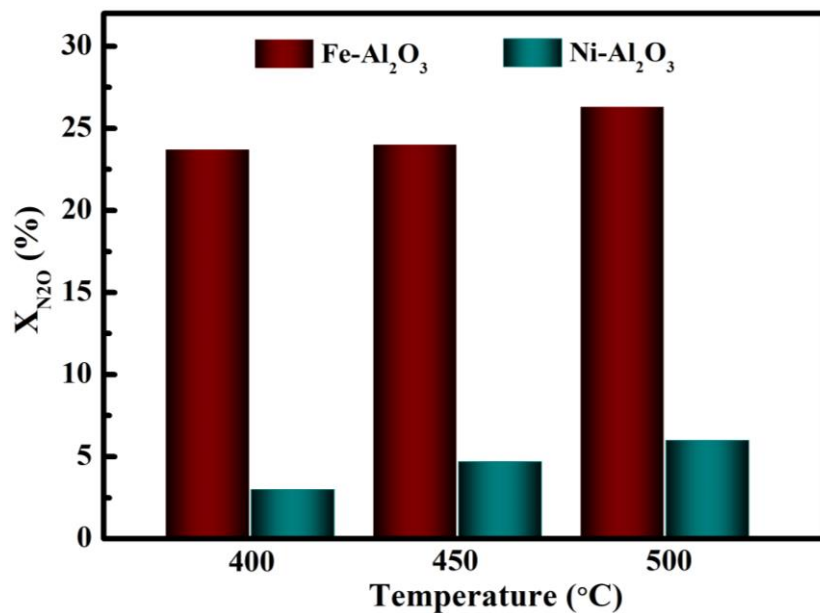

**Figure S2.** N<sub>2</sub>O splitting as a function of reaction temperature over mesoporous Ni-Al<sub>2</sub>O<sub>3</sub> with 10% molar fraction of Ni, and Fe-Al<sub>2</sub>O<sub>3</sub> with 10% molar fraction of Fe. Reaction conditions: Feed gas flow rate = 25 mL min<sup>-1</sup>, N<sub>2</sub>O concentration = 10 vol%, He as balance gas.

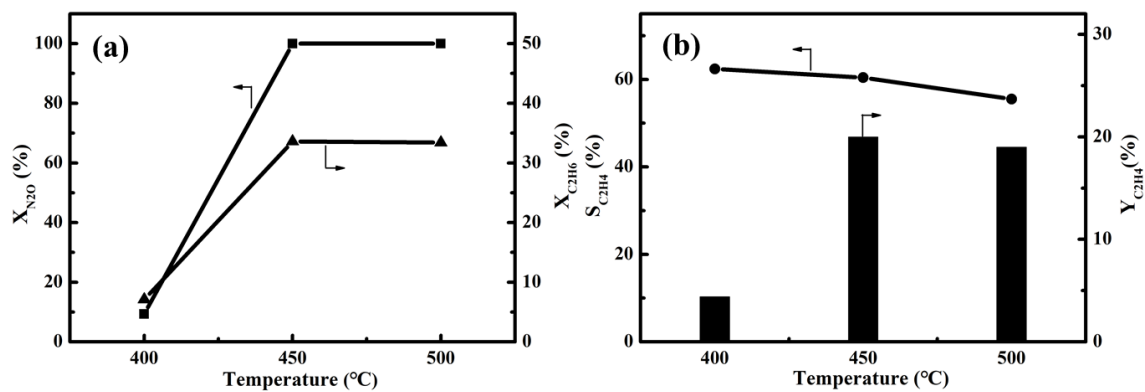

**Figure S3.** Catalytic performance of fresh Ni-Fe-Al<sub>2</sub>O<sub>3</sub> for ODH. Reaction conditions: Feed gas flow rate = 25 mL min<sup>-1</sup>, C<sub>2</sub>H<sub>6</sub> concentration = 10 vol%, N<sub>2</sub>O concentration = 10 vol%, He as balance gas.

**Table S1** Percentage of Ni and Fe species determined by XPS method

| Sample                                     | Ni 2p <sub>3/2</sub> |                  |                 | Fe 2p <sub>3/2</sub> |                  |
|--------------------------------------------|----------------------|------------------|-----------------|----------------------|------------------|
|                                            | Sat                  | Ni <sup>2+</sup> | Ni <sup>0</sup> | Fe <sup>3+</sup>     | Fe <sup>2+</sup> |
| Ni-Fe-Al <sub>2</sub> O <sub>3</sub>       | 49.4                 | 50.6             | 0               | 80.3                 | 19.7             |
| Ni-Fe-Al <sub>2</sub> O <sub>3</sub> -H400 | 41.4                 | 58.6             | 0               | 55.6                 | 44.4             |
| Ni-Fe-Al <sub>2</sub> O <sub>3</sub> -H600 | 35.7                 | 53.5             | 10.8            | 46.8                 | 53.2             |

“Sat” represents satellite peak.

**Table S2.** Catalytic behaviors of Ni-Fe-Al<sub>2</sub>O<sub>3</sub> catalysts with different Fe doping amount for ODH.

| Catalyst                                  | X <sub>N<sub>2</sub>O</sub> (%) | X <sub>C<sub>2</sub>H<sub>6</sub></sub> (%) | S <sub>C<sub>2</sub>H<sub>4</sub></sub> (%) | Y <sub>C<sub>2</sub>H<sub>4</sub></sub> (%) |
|-------------------------------------------|---------------------------------|---------------------------------------------|---------------------------------------------|---------------------------------------------|
| 10Ni-Al <sub>2</sub> O <sub>3</sub>       | 9.5 (8.2)                       | 7.2 (6.4)                                   | 88.9 (89.9)                                 | 6.4 (5.7)                                   |
| 10Ni-0.5Fe-Al <sub>2</sub> O <sub>3</sub> | 51.2 (78.0)                     | 22.8 (27.6)                                 | 74.7 (67.9)                                 | 17.0 (18.8)                                 |
| 10Ni-1Fe-Al <sub>2</sub> O <sub>3</sub>   | 99.1 (95.7)                     | 35.8 (30.6)                                 | 59.3 (63.2)                                 | 21.2 (19.3)                                 |
| 10Ni-3Fe-Al <sub>2</sub> O <sub>3</sub>   | 100 (100)                       | 33.5 (31.8)                                 | 57.6 (60.4)                                 | 19.3 (19.2)                                 |

The values in parentheses are the catalytic results after reaction for 3 h.

**Table S3.** Representative results reported in literatures toward low temperature ( $\leq 500$  °C) ODH reaction.

| Catalyst                                                                         | Synthesis                   | Metal ratio     | Feed gas                                                                                 | $Y_{C_2H_4}$               | Ref.      |
|----------------------------------------------------------------------------------|-----------------------------|-----------------|------------------------------------------------------------------------------------------|----------------------------|-----------|
| Ni-Fe-<br>Al <sub>2</sub> O <sub>3</sub>                                         | EISA                        | Ni/Fe=<br>10/3  | 10% C <sub>2</sub> H <sub>6</sub> +<br>10% N <sub>2</sub> O+He                           | 18% (400°C)                | This work |
| Ni-Ce/<br>Al <sub>2</sub> O <sub>3</sub>                                         | Impregnation                | Ce/Ni=<br>0.25  | 6% C <sub>2</sub> H <sub>6</sub> +6% O <sub>2</sub><br>+He                               | 7.7% (400°C)               | 1         |
| Ni-Ce/<br>Al <sub>2</sub> O <sub>3</sub>                                         | Impregnation                | Ni/Ce=<br>11/3  | 6% C <sub>2</sub> H <sub>6</sub> +6% O <sub>2</sub> +<br>He                              | 20% (500°C)                | 2         |
| Ni-Ce/<br>Al <sub>2</sub> O <sub>3</sub>                                         | Impregnation                | Ce/Ni=<br>0.13  | 6% C <sub>2</sub> H <sub>6</sub> +6% O <sub>2</sub><br>+He                               | 23.5% (450°C)              | 3         |
| Cordierite monoliths coated with Ni-Ce/ $\gamma$ -Al <sub>2</sub> O <sub>3</sub> | washcoating                 | Ni/Ce=<br>19/8  | 6% C <sub>2</sub> H <sub>6</sub> +6% O <sub>2</sub><br>+He                               | 17% (450°C)                | 4         |
| Ni-Al mixed oxide                                                                | Co-precipitation            | 80 wt% NiO      | C <sub>2</sub> H <sub>6</sub> /N <sub>2</sub> O/He=<br>1/1/48                            | 18% (420°C)<br>24% (460°C) | 5         |
| NiO/<br>Al <sub>2</sub> O <sub>3</sub>                                           | Impregnation                | –               | 10% C <sub>2</sub> H <sub>6</sub> +10% O <sub>2</sub><br>+N <sub>2</sub>                 | 38.6% (450°C)              | 6         |
| Ni-Fe/<br>$\gamma$ -Al <sub>2</sub> O <sub>3</sub>                               | Coprecipitation -deposition | Ni/(Ni+Fe)=0.9  | 0.5% C <sub>2</sub> H <sub>6</sub> +<br>0.5% O <sub>2</sub> +N <sub>2</sub>              | 40.1% (400°C)              | 7         |
| Fe/Al <sub>2</sub> O <sub>3</sub>                                                | Vapor deposition            | 3.6 wt% Fe      | 11.6% C <sub>2</sub> H <sub>6</sub> +5.2% O <sub>2</sub> +75.2% He+<br>8% N <sub>2</sub> | 2.7% (400°C)               | 8         |
| NiO-CeO <sub>2</sub>                                                             | Evaporation                 | Ni/Ce=<br>12    | 9.1% C <sub>2</sub> H <sub>6</sub> +<br>3% O <sub>2</sub><br>+87.9% He                   | 6.1% (275°C)               | 9         |
| NiO/TiO <sub>2</sub>                                                             | Evaporation                 | 50 wt% NiO      | C <sub>2</sub> H <sub>6</sub> /O <sub>2</sub> /He=<br>3/3/24                             | 41% (450°C)                | 10        |
| Ni-Nb-O/CeZrO                                                                    | Evaporation                 | Nb/Ni=<br>0.176 | C <sub>2</sub> H <sub>6</sub> /O <sub>2</sub> =2/1                                       | 27.6% (450°C)              | 11        |

## References

- 1 J. P. Bortolozzi, T. Weiss, L. B. Gutierrez and M. A. Ulla, *Chem. Eng. J.*, 2014, **246**, 343-352.
- 2 L. Smoláková, M. Kout, E. Koudelková and L. Čapek, *Ind. Eng. Chem. Res.*, 2015, **54**, 12730-12740.
- 3 L. Smoláková, M. Kout and L. Čapek, *Topics in Catalysis*, 2015, **58**, 843-853.
- 4 P. Brussino, J. P. Bortolozzi, V. G. Milt, E. D. Banús and M. A. Ulla, *Catal Today*, 2016, **273**, 259-265.
- 5 Y. Zhou, J. Lin, L. Li, M. Tian, X. Li, X. Pan, Y. Chen and X. Wang, *J. Catal.*, 2019, **377**, 438-448.
- 6 X. Zhang, J. Liu, Y. Jing and Y. Xie, *Appl. Catal. A: Gene.*, 2003, **240**, 143-150.
- 7 M. Hurtado Cotillo, D. Unsihuay, C. E. Santolalla-Vargas, A. Paredes Doig, R. Sun Kou and G. Picasso, *Catal Today*, 2019, DOI: <https://doi.org/10.1016/j.cattod.2019.05.044>.
- 8 L. Xu, X. Lin, Y. Xi, X. Lu, C. Wang and C. Liu, *Materials Research Bulletin*, 2014, **59**, 254-260.
- 9 B. Solsona, P. Concepción, S. Hernández, B. Demicol and J. M. L. Nieto, *Catal Today*, 2012, **180**, 51-58.
- 10 R. Sanchis, D. Delgado, S. Agouram, M. D. Soriano, M. I. Vázquez, E. Rodríguez-Castellón, B. Solsona and J. M. L. Nieto, *Appl. Catal. A: Gene.*, 2017, **536**, 18-26.
- 11 M. Lee, Y. S. Yun, J. Sung, J. Lee, Y.-J. Seo, I. K. Song and J. Yi, *Catal. Commun.*, 2017, **95**, 58-62.
